# Supplementary material for: Adaptive Prediction Error Coding in the Human Midbrain and Striatum Facilitates Behavioral Adaptation and Learning Efficiency
Source: PubMed Central journal article supplement (PMC4893165; doi:10.1016/j.neuron.2016.04.019), 2016-06-01
Supplement: mmc1.pdf [file mmc1.pdf]

**Neuron, Volume 90**

**Supplemental Information**

**Adaptive Prediction Error Coding  
in the Human Midbrain and Striatum Facilitates  
Behavioral Adaptation and Learning Efficiency**

**Kelly M.J. Diederer, Tom Spencer, Martin D. Vestergaard, Paul C. Fletcher, and Wolfram Schultz**

1 **Supplemental Inventory**  
2  
3 1. Supplemental Figures  
4  
5 Figure S1. Related to Experimental Procedures  
6 Figure S2. Related to Figure 1  
7 Figure S3. Related to Figure 1  
8  
9 2. Supplemental Tables  
10  
11 Table S1. Related to Experimental Procedures.  
12  
13 3. Supplemental Experimental Procedures  
14  
15 4. Supplemental References  
16  
17  
18  
19  
20  
21  
22  
23  
24  
25  
26  
27  
28  
29  
30  
31  
32  
33  
34  
35  
36  
37  
38  
39  
40  
41  
42  
43  
44  
45  
46  
47  
48  
49  
50  
51  
52

53 **Supplemental Figures**

54  
55  
56  
57

**Figure S1.** A priori defined region of interest (ROI).

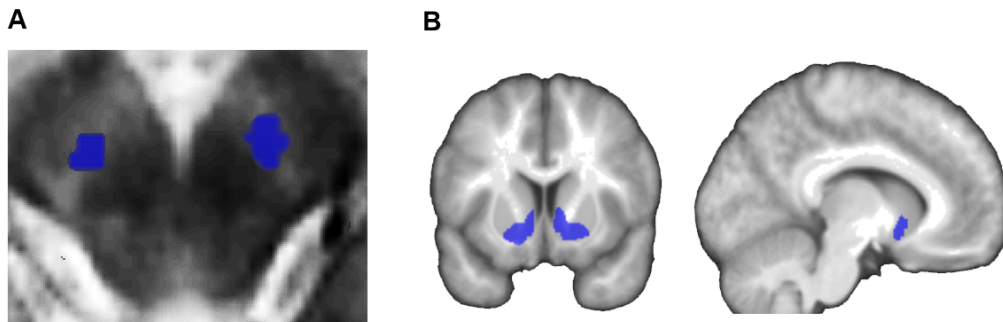

58  
59

60 A. Midbrain (SN/VTA) ROI depicted in blue on a magnetic transfer imaging scan. The SN/VTA  
61 complex is visible as a light grey band. As adaptive coding effects are likely to be subtle, we  
62 constructed maximum sensitive ROIs by using a functional ROI that was restricted by anatomical  
63 boundaries in line with the procedure by Gruber et al. (2014). We traced the SN/VTA complex (light  
64 grey band) on a normalized magnetic transfer image acquired using the same MRI scanner as the  
65 functional MR images. Subsequently, we inclusively masked the anatomical ROI with clusters of  
66 significant prediction error related activation reported in a recent meta-analysis (data provided by  
67 Garrison et al., 2013). B. Ventral striatal ROI (blue). The ventral striatal ROI was traced on the average  
68 T1 scan of our participants following the definition of the ventral striatum by Laruelle et al. (Martinez  
69 et al., 2003). As with the SN/VTA ROI, we inclusively masked this anatomical ROI with prediction  
70 error related activation reported in a recent meta-analysis (data provided by Garrison et al., 2013).

71  
72  
73  
74  
75

**Figure S2.** Main model parameters fitted to participants' behavior for separate SD conditions

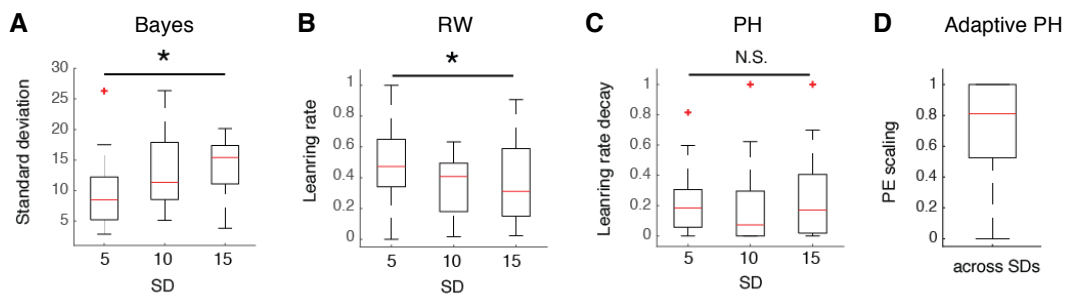

76  
77  
78  
79  
80  
81  
82  
83  
84  
85  
86  
87  
88  
89  
90  
91  
92  
93  
94

76 A. In the Bayesian model, the free parameter  $\sigma^2$  indicated participants' estimates of the variance  
77 associated with each SD condition. Here we plot the standard deviation, i.e., the square root of the  
78 variance. Participants' estimates of the variance increased in parallel with actual increases in reward  
79 variance. B. Fitted Rescorla-Wagner (RW) constant learning rates decreased when SD increased, in  
80 line with behavioral adaptation and the (initial) learning rates estimated for the non-adaptive Pearce-  
81 Hall model (supplemental experimental material). C. The gradual decay in learning rate as described in  
82 the Pearce-Hall (PH) model did not vary between SD conditions, indicating that the effect of trial  
83 number did not interact with SD. D. The free parameter  $\nu$  indicates the extent to which participants  
84 scaled their prediction errors in the adaptive PH model (supplemental experimental procedures). A  
85 parameter value of 0 indicates absence of prediction error scaling, whereas a value of 1 indicates that  
86 participants divide their value by the  $\log(\text{SD})$  of reward distributions. \* denotes significant; N.S., not  
87 significant. SD, standard deviation; RW, Rescorla-Wagner; PH, Pearce-Hall; PE, prediction error.  
88 Boxplots indicate the minimum and maximum parameter estimates excluding outliers, the lower and  
89 upper quartile and the median (red line).

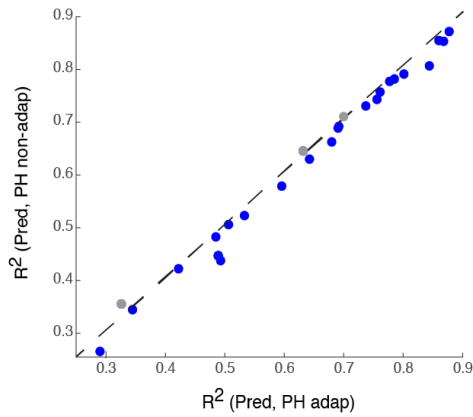

95  
96  
97  
98  
99  
100  
101  
102  
103  
104  
105  
106  
107  
108  
109  
110  
111  
112

**Figure S3.**  $R^2$  values from linear regressions where modeled predictions from the non-adaptive (Eq. 4) and adaptive (Eq. 5) Pearce-Hall models were the independent variables and participants' predictions were the dependent variable. Although the differences between the  $R^2$  for the two models are subtle, most participants' predictions were better explained by the adaptive Pearce-Hall model. Indeed, predictions generated by the adaptive PH model were a significantly better predictor of participants' predictions than the non-adaptive PH model ( $T(26) = 2.56$ ,  $p = 0.0083$ ). Blue/ grey dots represent participants whose behavior was best predicted by the adaptive/ non-adaptive Pearce-Hall model.

**Supplemental Tables**

**Table S1:** Description of free parameters fitted for each model per SD condition.

| Model       | # $\Phi$ | Parameters             |
|-------------|----------|------------------------|
| Bayes       | 2        | $\sigma_0^2, \sigma^2$ |
| RW          | 1        | $\alpha$               |
| PH          | 2        | $\alpha, \gamma$       |
| Adaptive PH | 3        | $\alpha, \gamma, \nu$  |

113 See Fig. S2 for the main parameter estimates per SD condition.  
114  
115  
116  
117  
118  
119  
120  
121  
122  
123  
124  
125  
126  
127  
128  
129  
130  
131  
132  
133  
134

## Supplemental Experimental Procedures

*Participants.* We recruited twenty-seven healthy volunteers (11 male; 16 female) through local advertisements. Participants were between 18 and 41 (mean 24.49, s.e.m. 1.06) years of age; they were fluent English speakers and did not have a history of a neurological or psychiatric illness or drug abuse. This study was approved by the Local Research Ethics Committee of the Cambridgeshire Health Authority. After description of the study to the Participants, written informed consent was obtained.

*Reward distributions.* All reward distributions contained 21 rewards which were drawn without replacement, thus ensuring that each participant received the same rewards. Each participant completed three task sessions of 10 min each during fMRI data acquisition. Every session used two reward distributions drawn pseudo randomly from the six distributions, resulting in 42 trials per session (i.e., 21 trials per distribution; 2 distributions per session). The order of rewards within a distribution was counterbalanced over participants. Importantly, both the EV and the SD of the two distributions within a session were different, and each distribution occurred only once per participant. Distributions were presented in short blocks of 4-6 trials. There were six possible pairs of distributions, of which each participant saw three pairs (i.e., 1 pair per session). Fourteen participants were presented with the first combination of pairs (SD5 EV35 and SD10 EV65, SD10 EV35 and SD15 EV65, SD15 EV35 and SD5 EV65). The remaining thirteen participants performed the second combination (SD 5 EV35 and SD15 EV65, SD10 EV35 and SD5 EV65, SD15 EV35 and SD10 EV65). The order of rewards within a condition was pseudo-randomized. First, we randomized the rewards within a condition using Matlab. Subsequently, we ensured that outliers did not occur in succeeding trials. All distributions had zero skewness, no tails and non-significant deviation from normality (Shapiro-Wilk;  $p = 0.54, 0.89$  and  $0.92$  for SD's of £5, £10 and £15). However, they were slightly less 'peaked' than a true Gaussian distribution as indicated by a kurtosis of 2.6 (SD 5), 2.6 (SD 10) and 2.57 (SD 15).

*Instructions.* We indicated to the participants that rewards were drawn from 'pots' (i.e., distributions) with a small, medium or large degree of variability as indicated by the bar cues. Furthermore, we informed participants that each of the three task sessions required them to alternately predict from one of two 'pots' (distributions) resulting in a total of six different pots (small variability  $N=2$ ; medium variability  $N=2$  and large variability  $N=2$ ). We explicitly stated that all changes in condition would be signalled using the bar cues. Participants were only ignorant about the exact parameter values (i.e., the EVs and SDs used as well as the frequency of alternation between the two distributions within a session). Debriefing after the experiment revealed that participants believed that each of the six distributions had a different EV. We informed the participants that the goal of the experiment was to predict the next reward as closely as possible from the past reward history. As the imposed variability would render it unlikely for participants to achieve full accuracy predicting upcoming rewards, we instructed participants to minimize their total error over all trials.

*Practice sessions.* To familiarize participants with a trackball mouse, participants completed a short motor task prior to the main task. In each trial (total of 90 trials) participants were required to scroll to a specific number on the scale, indicated in green on top of the scale. In addition, participants completed two behavioral training sessions prior to the fMRI experiment using rewards drawn from distributions with a different SD (i.e., £7 and £14) and EV (i.e., £30 and £60). We proceeded to the fMRI experiment if participants were fully aware of all task contingencies except for the exact SDs and EVs used.

*Control trials.* We pseudo randomly interspersed, unannounced control trials (20% of all trials) into the main task to ensure that participants revealed their true reward predictions. Pay-off in these control trials depended on performance ( $|prediction - EV|$ ). Prediction error magnitude within one or two SDs of the EV resulted in a pay-off of £7.50 and £5.00, respectively. All other predictions led to a pay-off of £2.50. As in the main trials, the monitor displayed the reward drawn by the computer after the participant had indicated the prediction. However, the reward was shown in red to signal that in this trial prize money/ pay-off depended on participants' performance. Thus, importantly, there was no indication about the control trial at the time the participants stated their predictions, encouraging participants to optimize their performance on all trials.

*Reward process.* The reward  $x$  on every trial is drawn from a distribution with a Gaussian prior  $x \sim \mathcal{N}(\mu, \sigma^2)$ . In the main text, we refer to the expected value ( $EV = \mu$ ) and to the standard

194 deviation (SD =  $\sigma$ ) of the reward. On trial  $n$ , participants predict to receive reward  $y_n$  and they observe  
 195 the prediction error  $\delta_n = x_n - y_n$ .

196

197 *Models.* We consider cases, in which the participants' predictions are assumed to result from a  
 198 recursive generative process,  $y_n = y_{n-1} + k_n \delta_n$ , where  $k_n$  denotes the Kalman gain (i.e., learning  
 199 rate).

200

201 1. Bayesian mean tracker. Optimal performance on this task is achieved through accurate estimation of  
 202 the EV of the reward. An optimal estimator of the Gaussian prior  $\mu$  is derived from Bayes' rule. The  
 203 conjugate prior is  $\mu \sim \mathcal{N}(\mu_0, \sigma_0^2)$ , and given an observation  $X = [x_1 \ x_2 \ \dots \ x_N]$ , the log-likelihood of the  
 204 posterior  $\mu \sim \mathcal{N}(\mu_N, \sigma_N^2)$ , is given by:

205

$$206 \quad \log[p(\mu|X)] = -\frac{1}{2\sigma_N^2}(\mu - \mu_N)^2 + K_1 = -\frac{1}{2\sigma_N^2}\mu^2 + \frac{\mu_N}{\sigma_N^2}\mu + K_2$$

207

208 From Bayes' rule, we have  $p(\mu|X) \propto p(X|\mu, \sigma^2)p(\mu|\mu_0, \sigma_0^2)$ , and so:

209

$$210 \quad \begin{aligned} \log[p(\mu|X)] &= -\frac{1}{2\sigma^2} \sum_n^N (x_n - \mu)^2 - \frac{1}{2\sigma_0^2} (\mu - \mu_0)^2 + K_3 \\ &= -\frac{1}{2} \left[ \frac{1}{\sigma_0^2} + \frac{N}{\sigma^2} \right] \mu^2 + \left[ \frac{\mu_0}{\sigma_0^2} + \frac{\sum_n^N x_n}{\sigma^2} \right] \mu + K_4 \end{aligned}$$

211

212 where  $K_i$  are constant terms. Thus, since:

213

$$214 \quad \frac{1}{2\sigma_N^2} = \frac{1}{2} \left[ \frac{1}{\sigma_0^2} + \frac{N}{\sigma^2} \right]$$

215

216 the posterior variance is:

217

$$218 \quad \sigma_N^2 = \frac{\sigma^2 \sigma_0^2}{N\sigma_0^2 + \sigma^2}$$

219

220 Similarly, since:

221

$$222 \quad \frac{\mu_N}{\sigma_N^2} = \frac{\mu_0}{\sigma_0^2} + \frac{\sum_n^N x_n}{\sigma^2}$$

223

224 the posterior mean is:

225

$$226 \quad \mu_N = \frac{\sigma^2}{N\sigma_0^2 + \sigma^2} \mu_0 + \frac{N\sigma_0^2}{N\sigma_0^2 + \sigma^2} \bar{X}$$

227

228 where  $N\bar{X} = \sum_n^N x_n$ .

229

230 We consider the case, in which participants update the prior after each observation ( $N = 1$ ). This  
 231 seems reasonable since a subjective prediction is required in response to every prediction error after  
 232 each reward.

233

$$234 \quad \mu_n = \frac{\sigma^2}{\sigma_{n-1}^2 + \sigma^2} \mu_{n-1} + \frac{\sigma_{n-1}^2}{\sigma_{n-1}^2 + \sigma^2} x_n = \mu_{n-1} + \frac{\sigma_{n-1}^2}{\sigma_{n-1}^2 + \sigma^2} (x_n - \mu_{n-1})$$

235

236 Therefore, the Kalman gain (i.e., learning rate) for an optimal mean tracker in these experiments is:

237

$$238 \quad k_n = \frac{\sigma_{n-1}^2}{\sigma_{n-1}^2 + \sigma^2}$$

239

240 The posterior prediction is  $y_n \sim \mathcal{N}(\mu_n, \hat{\sigma}_n^2)$ , where  $\hat{\sigma}_n^2 = \sigma_n^2 + (1 - k_n)\sigma_{n-1}^2$ .

241

242 As participants may have differed in their estimates of reward variability, we estimated the most likely  
 243 value of  $\sigma^2$  used by each individual participant. Moreover, since we only used two different EVs in the  
 244 main task, participants had the opportunity to build strong priors between sessions. However, the  
 245 participants' posterior means (i.e., final predictions) in the first session did not show a significant  
 246 positive correlation with the first predictions in the second session (all  $p > 0.1$ ). Similarly, the final  
 247 predictions in the second session did not show a significant positive correlation with the initial  
 248 predictions in the third session (all  $p > 0.1$ ). Therefore, we did not include structural priors in the  
 249 Bayesian model.

250  
 251 2. Rescorla-Wagner learning rule (RW; Rescorla and Wagner 1972). The RW model is one of the most  
 252 influential theories of associative learning in human and particularly animal learning theory. In this  
 253 simple associative learning model, individuals are assumed to use a constant learning rate that controls  
 254 how much an observed prediction error will influence new predictions:

$$255 \quad k_n = \alpha$$

256  
 257 In this case, predictions are assumed to be generated by constant learning.

258  
 259 3. Pearce-Hall (PH; Pearce and Hall, 1980). Although RW may facilitate stable predictions when  
 260 reward magnitude is constant, a fixed learning rate will result in varying predictions when rewards  
 261 fluctuate, i.e., participants persistently 'chase the prediction error'. Stable predictions may, however, be  
 262 achieved through the use of a decaying learning rate as described in the PH associability model:  
 263  
 264

$$265 \quad k_n = \gamma C |\delta_{n-1}| + (1 - \gamma)k_{n-1}$$

266  
 267 where  $|\delta|$  denotes absolute prediction error and  $C$  is an arbitrary scaling coefficient. We combine the  
 268 PH associability (learning rate) with the recursive generative process described above in line with the  
 269 procedure suggested by Li et al (2011). The recursive process is initialized with the initial learning rate  
 270  $k_0 = \alpha$ . In this case, predictions are assumed to be generated under decaying learning rate with the  
 271 decay constant  $\gamma$ . Importantly, learning rates depend on the absolute prediction error and the learning  
 272 rate on the previous trial as well as on the decay constant  $\gamma$ . A critical feature of this model is that it  
 273 allows for the combination of high initial learning rate and exponential decay enabling substantial  
 274 initial updating as well as asymptotically stable later predictions. Moreover, while SD may influence  
 275 the initial learning rate as well as the decay constant, we have previously shown that the effect of SD  
 276 was primarily on the initial learning rate (Diederer and Schultz, 2015).  
 277

278 4. Adaptive Pearce-Hall (Diederer and Schultz, 2015). To account for the potential effect of SD in the  
 279 PH model, we scaled the prediction error relative to  $\log(\text{SD})$  of the reward distributions. Note that an  
 280 improved fit by this model indicates that non-scaled PH learning rates vary with SD. The rationale for  
 281 scaling the prediction error rather than the learning rate was that previous non-human primate  
 282 electrophysiology studies showed encoding of normalized PEs, not learning rates (Tobler et al., 2005).  
 283 Since scaling compresses the operational range of the learning rate to update predictions, we added an  
 284 arbitrary scaling coefficient  $D$  to ensure scaling relative to, but with a quantity smaller than  $\log(\text{SD})$ . In  
 285 addition, as we previously showed individual variation in the degree of prediction error scaling, we  
 286 estimated the extent of prediction error scaling ( $0 \leq \nu \leq 1$ ) per participant (Diederer and Schultz,  
 287 2015):  
 288

$$289 \quad y_n = y_{n-1} + k_n \delta_n / \omega$$

$$290 \quad k_n = \gamma C |\delta_{n-1}| / \omega + (1 - \gamma)k_{n-1}$$

$$291 \quad \omega = (1 - \nu) + \nu \log(\text{SD}) / D$$

292  
 293 Here,  $\nu$  indicates the extent of prediction error scaling. The form of this update rule ensured that the  
 294 model could return both the absence of scaling ( $\nu = 0$ ) as well as scaling by the  $\log(\text{SD})$  ( $\nu = 1$ ).  
 295

296 *Model fitting.* For each model, we fit the free parameters  $\Phi$  to the subjective predictions  $Y$  by  
 297 maximizing the likelihood  $p(Y|\Phi) = \prod_m^M p(y_m|\Phi)$ , where  $p(y_m|\Phi) = \mathcal{N}(y_m, \hat{\sigma}^2)$  and  $Y =$   
 298  $[y_1 \ y_2 \ \dots \ y_M]$  is the subjective predictions. We used a combination of nonlinear optimization algorithms  
 299 implemented in MATLAB to estimate the free parameters to each participant's full data set over the  
 300 trials of all conditions. Since SD is a key parameter of the Bayesian model, we fit this model separately

301 for each SD condition and compared the resulting fits to similarly obtained fits for the RW and the PH  
302 model. In addition, as the main difference between the PH models is the SD-dependent change in  
303 learning rate (implemented using a single scaling parameter), we used model fits across SD conditions  
304 to compare the adaptive PH model to the non-adaptive models.

305  
306 *Functional MRI.* fMRI data were obtained at the Wolfson Brain Imaging Center, Cambridge,  
307 using a Siemens Trio 3T MRI scanner. We acquired 240 multiecho gradient-echo echo planar  $T_2^*$ -  
308 weighted images depicting blood oxygenation level-dependent (BOLD) contrast for each session of the  
309 task (Poser et al., 2006). Imaging at multiple echo times has the potential to increase sensitivity in brain  
310 regions that are typically subject to strong image distortions (Poser et al., 2006). Each participant  
311 completed 3 task sessions, resulting in 720 volumes per participant. We used the following parameters  
312 for obtaining BOLD images: 30 axial slices (3.78 mm slice thickness), repetition time (TR) 2100 ms,  
313 echo times (TEs): 12/ 27.91/43.82/ 59.73 ms, flip angle 82°, field of view (FOV) 14.4x14.4 cm, matrix  
314 64x64, in-plane resolution 3.75x3.75 mm. This resolution facilitated the detection of BOLD responses  
315 on whole-brain level. Whole brain coverage was of particular importance to investigate the alternative  
316 hypothesis that behavioral adaptation to reward variability is reflected in the coding of SD-dependent  
317 learning rates as learning rates are coded in frontal and occipital areas (Krugel et al. 2009; Payzan-  
318 LeNestour et al. 2013; Vilares et al. 2012). To improve localization of the functional data a high  
319 resolution anatomical scan was acquired during the same scan session ( $T_1$ ; MPRAGE; TR/TE  
320 2.98/2300 ms, 1x1 voxels, slice thickness 1 mm, flip angle 9°, FOV 24x25.6 mm, 176 slices).

321 Statistical parametric mapping (SPM8; Wellcome Department of Cognitive Neurology,  
322 London, UK) and MATLAB (MathWorks, Natick, MA) served to analyze and preprocess functional  
323 MRI data. Preprocessing included within-subject image realignment, voxelwise weighted echo  
324 combination (summation based on local  $T_2^*$  measurements) (Poser et al., 2006), coregistration of  
325 functional images with the  $T_1$ -weighted anatomical scan, spatial normalization to the Montreal  
326 Neurological Institute (MNI) template as present in SPM8 (Ashburner and Friston, 2005) and spatial  
327 smoothing using an 8mm full width at half maximum Gaussian kernel. To increase anatomic  
328 specificity, we repeated our preprocessing using a 6 mm smoothing kernel. The time-series in each  
329 session were high-pass filtered (1/180Hz) and serial autocorrelations were estimated using an AR(1)  
330 model.

### 331 332 333 **Supplemental References**

- 334  
335 Ashburner J, Friston KJ (2005) Unified segmentation. *NeuroImage* 26:839-851  
336 Poser, B.A., Versluis, M.J., Hoogduin, J.M., and Norris, D.G. (2006). BOLD contrast sensitivity  
337 enhancement and artifact reduction with multiecho EPI: Parallel-acquired inhomogeneity-  
338 desensitized fMRI. *Magnetic Resonance in Medicine* 55, 1227-1235.  
339 Vilares, I., Howard, J.D., Fernandes, H.L., Gottfried, J.A., and Kording, K.P. (2012). Differential  
340 representations of prior and likelihood uncertainty in the human brain. *Current biology* : CB  
341 22, 1641-1648.
